# Supplementary material for: Detection and Molecular Characterization of Canine Distemper Virus in Wildlife from Northern Italy
Source: MDPI journal article supplement (doi:10.3390/pathogens11121557), 2022-12-19
Supplement: s1 [file s1]

**Table S1.** Further laboratory analysis carried out on foxes' samples. Seven carcasses only were considered suitable for performing bacteriological examination

| <b>Analysis</b>                 | <b>Num. positive (p%)</b> |
|---------------------------------|---------------------------|
| Rabies virus                    | 0/67 (0%)                 |
| <i>Trichinella</i> spp.         | 0/67 (0%)                 |
| <i>Leishmania</i> spp.          | 0/67 (0%)                 |
| Aujeszký disease virus          | 0/67 (0%)                 |
| <b>Bacteriological analysis</b> |                           |
| <i>Escherichia coli</i>         | 2/7 (28%)                 |
| <i>Pseudomonas</i> spp.         | 1/7 (14%)                 |
